# Supplementary material
Source: PubMed Central journal article supplement (PMC4855373)

## ELECTRONIC SUPPLEMENTARY MATERIAL

**Table S1.** Locations and characteristics of 24 study sites: absolute latitude; mean annual temperature (T, °C); mean specific leaf area (SLA) of examined plant species ( $\text{cm}^2 \text{g}^{-1}$  dry mass); plant phylogenetic diversity (PD); stream pH; and wetted stream width (SW, m). A dash indicates that the value is unavailable.

| Code | Location                      | Region    | Latitude | T    | SLA | PD    | pH  | SW  |
|------|-------------------------------|-----------|----------|------|-----|-------|-----|-----|
| KEN  | Kenya                         | Tropical  | 0.37     | 15.8 | 131 | 0.384 | 8.3 | 3.2 |
| ECD  | Ecuador                       | Tropical  | 0.74     | 25.1 | 146 | 0.299 | 7.1 | 4.7 |
| MAL  | Malaysia                      | Tropical  | 3.15     | 24.8 | 35  | 0.401 | 6.9 | 0.9 |
| FGN  | French Guiana                 | Tropical  | 5.07     | 25.7 | 106 | 0.257 | 6.8 | 2.6 |
| IND  | India                         | Tropical  | 8.80     | 26.9 | –   | 0.401 | 7.5 | 5.2 |
| PAN  | Panama                        | Tropical  | 9.09     | 26.2 | 226 | 0.307 | 7.2 | 6.5 |
| VEN  | Venezuela                     | Tropical  | 9.33     | 27.6 | 148 | 0.354 | 8.3 | 6.5 |
| TRN  | Trinidad                      | Tropical  | 10.40    | 26.0 | –   | 0.401 | 8.2 | 1.1 |
| CRA  | Costa Rica                    | Tropical  | 10.43    | 26.0 | 108 | 0.292 | 6.0 | 3.0 |
| PRC  | Puerto Rico, USA              | Tropical  | 18.32    | 21.3 | 92  | 0.401 | 7.1 | 8.0 |
| QLD  | Queensland, Australia         | Tropical  | 18.98    | 20.7 | 102 | 0.266 | 6.1 | 8.5 |
| BRL  | Brazil                        | Tropical  | 19.27    | 18.0 | 250 | 0.318 | 5.2 | 0.5 |
| MEX  | Mexico                        | Tropical  | 19.73    | 15.3 | 70  | 0.395 | 8.3 | 0.9 |
| HKN  | Hong Kong                     | Tropical  | 22.43    | 21.7 | 162 | 0.385 | 6.9 | 3.2 |
| NSW  | New South Wales,<br>Australia | Temperate | 30.26    | 18.1 | –   | 0.316 | 7.9 | 4.2 |
| JAP  | Japan                         | Temperate | 35.83    | 7.6  | 97  | 0.264 | 8.2 | 3.7 |
| CHL  | Chile                         | Temperate | 36.88    | 11.9 | 60  | 0.375 | 7.4 | 7.0 |
| PTG  | Portugal                      | Temperate | 40.08    | 12.3 | 69  | 0.119 | 6.5 | 1.9 |
| NZL  | New Zealand                   | Temperate | 40.81    | 10.1 | –   | 0.367 | 7.1 | 2.0 |
| ARG  | Argentina                     | Temperate | 41.24    | 5.5  | 180 | 0.401 | 7.3 | 1.1 |
| NYK  | New York, USA                 | Temperate | 42.75    | 9.0  | 220 | 0.344 | 7.3 | 3.0 |
| TAS  | Tasmania, Australia           | Temperate | 42.78    | 9.8  | 88  | 0.250 | 7.7 | 1.5 |
| FRN  | France                        | Temperate | 43.42    | 12.3 | 283 | 0.144 | 7.0 | 1.5 |
| GER  | Germany                       | Temperate | 47.80    | 6.9  | 148 | 0.401 | 6.6 | 5.3 |

**Table S2.** Specific leaf area, SLA ( $\text{cm}^2 \text{g}^{-1}$  dry mass), of plant species used in the litter breakdown experiment at 24 study sites. See Table S1 for site codes. A dash indicates that the value is unavailable.

| Site | Plant species                     | Family           | SLA |
|------|-----------------------------------|------------------|-----|
| KEN  | <i>Dombeya goetzenii</i>          | Malvaceae        | 167 |
|      | <i>Pittosporum viridiflorum</i>   | Pittosporaceae   | 126 |
|      | <i>Rhus natalensis</i>            | Anacardiaceae    | 99  |
| ECD  | <i>Inga punctata</i>              | Fagaceae         | 130 |
|      | <i>Triplaris dugandii</i>         | Polygonaceae     | 191 |
|      | <i>Zygia cataractea</i>           | Fagaceae         | 118 |
| MAL  | <i>Dipterocarpus elongatus</i>    | Dipterocarpaceae | 19  |
|      | <i>Gigantochloa scortechinii</i>  | Poaceae          | 33  |
|      | <i>Macaranga tanarius</i>         | Euphorbiaceae    | 53  |
| FGN  | <i>Eperua falcata</i>             | Fagaceae         | 142 |
|      | <i>Qualea rosea</i>               | Vochysiaceae     | 71  |
|      | <i>Vochysia densiflora</i>        | Vochysiaceae     | 106 |
| IND  | <i>Pongamia pinnatum</i>          | Fagaceae         | –   |
|      | <i>Syzygium cumini</i>            | Myrtaceae        | –   |
|      | <i>Vitex leucoxydon</i>           | Lamiaceae        | –   |
| PAN  | <i>Hirtella triandra</i>          | Chrisobalanaceae | 235 |
|      | <i>Myriocarpa longipes</i>        | Urticaceae       | 190 |
|      | <i>Rinorea sylvatica</i>          | Violaceae        | 253 |
| VEN  | <i>Anacardium excelsum</i>        | Anacardiaceae    | 110 |
|      | <i>Ficus maxima</i>               | Moraceae         | 146 |
|      | <i>Hura crepitans</i>             | Euphorbiaceae    | 187 |
| TRN  | <i>Clathrotropis brachypetala</i> | Fagaceae         | –   |
|      | <i>Miconia multispicata</i>       | Melastomataceae  | –   |
|      | <i>Tabernaemontana undulata</i>   | Apocynaceae      | –   |
| CRA  | <i>Cecropia obtusifolia</i>       | Cecropiaceae     | 123 |
|      | <i>Ficus insipida</i>             | Moraceae         | 91  |
|      | <i>Hampea appendiculata</i>       | Malvaceae        | 111 |
| PRC  | <i>Cecropia schreberiana</i>      | Cecropiaceae     | 86  |
|      | <i>Dacryodes excelsa</i>          | Burseraceae      | 134 |
|      | <i>Manilkara bidentata</i>        | Sapotaceae       | 55  |
| QLD  | <i>Apodytes brachystyllis</i>     | Icacinaceae      | 128 |
|      | <i>Cryptocarya leucophylla</i>    | Lauraceae        | 100 |
|      | <i>Endiandra bessaphila</i>       | Lauraceae        | 77  |
| BRL  | <i>Miconia chartacea</i>          | Melastomataceae  | 209 |
|      | <i>Myrcia guyanensis</i>          | Myrtaceae        | 214 |
|      | <i>Protium brasiliense</i>        | Burseraceae      | 327 |
| MEX  | <i>Alnus acuminata</i>            | Betulaceae       | 69  |
|      | <i>Meliosma dentata</i>           | Sabiaceae        | 69  |
|      | <i>Zinowiewia coccinea</i>        | Celastraceae     | 73  |
| HKN  | <i>Castanopsis fissa</i>          | Fagaceae         | 193 |
|      | <i>Ficus fistulosa</i>            | Moraceae         | 171 |
|      | <i>Liquidambar formosana</i>      | Hamamelidaceae   | 123 |
| NSW  | <i>Alphitonia excelsa</i>         | Rhamnaceae       | –   |
|      | <i>Eucalyptus microcorys</i>      | Myrtaceae        | –   |

**Table S2** continued

| Site | Plant species                  | Family         | SLA |
|------|--------------------------------|----------------|-----|
|      | <i>Ficus coronata</i>          | Moraceae       | –   |
| JAP  | <i>Corylus sieboldiana</i>     | Betulaceae     | 87  |
|      | <i>Prunus jamasakura</i>       | Rosaceae       | 101 |
|      | <i>Quercus serrata</i>         | Fagaceae       | 105 |
| CHL  | <i>Chusquea quila</i>          | Poaceae        | 109 |
|      | <i>Nothofagus dombeyi</i>      | Nothofagaceae  | 38  |
|      | <i>Peumus boldus</i>           | Monimiaceae    | 33  |
| PTG  | <i>Alnus glutinosa</i>         | Betulaceae     | 70  |
|      | <i>Castanea sativa</i>         | Fagaceae       | 83  |
|      | <i>Quercus robur</i>           | Fagaceae       | 56  |
| NZL  | <i>Melicytus ramiflorus</i>    | Violaceae      | –   |
|      | <i>Myoporum laetum</i>         | Myoporaceae    | –   |
|      | <i>Pittosporum eugenioides</i> | Pittosporaceae | –   |
| ARG  | <i>Berberis serratodentata</i> | Berberidaceae  | 75  |
|      | <i>Fuchsia magellanica</i>     | Onagraceae     | 325 |
|      | <i>Nothofagus pumilio</i>      | Nothofagaceae  | 140 |
| NYK  | <i>Acer saccharum</i>          | Sapindaceae    | 205 |
|      | <i>Quercus rubra</i>           | Fagaceae       | 168 |
|      | <i>Tilia americana</i>         | Tilaceae       | 288 |
| TAS  | <i>Eucalyptus globulus</i>     | Myrtaceae      | 40  |
|      | <i>Eucalyptus obliqua</i>      | Myrtaceae      | 51  |
|      | <i>Pomaderris apetala</i>      | Urticaceae     | 172 |
| FRN  | <i>Corylus avellana</i>        | Betulaceae     | 330 |
|      | <i>Fagus sylvatica</i>         | Fagaceae       | 324 |
|      | <i>Quercus robur</i>           | Fagaceae       | 196 |
| GER  | <i>Acer pseudoplatanus</i>     | Sapindaceae    | 167 |
|      | <i>Fagus sylvatica</i>         | Fagaceae       | 147 |
|      | <i>Fraxinus excelsior</i>      | Oleaceae       | 129 |

**Table S3.** GenBank sequences for partial 18S rDNA, *rbcl*, *matK*, *atpB*, *trnl*, *rpl16*, *rpoB*, and *rpoC1* in 70 plant species used in the litter breakdown experiment. Sequences for congeners were used when no data were available for a particular species (marked with asterisks). Five outgroups are included.

| Species                           | <i>rbcl</i> | 18sITS5.8s25s | <i>matK</i> | <i>atpB</i> | <i>trnl</i> | <i>rpl16</i> | <i>rpoB</i> | <i>rpoC1</i> | 18S        |
|-----------------------------------|-------------|---------------|-------------|-------------|-------------|--------------|-------------|--------------|------------|
| <i>Acer pseudoplatanus</i>        | HM849739.1  | AY605341.1    | AJ438782.1  |             | DQ978552.1  |              | FJ395686.1  | FJ395816.1   |            |
| <i>Acer saccharum</i>             | L13181.1    | AF020363.1    | EU749291.1  | AF035893.1  | AF401173.1  | AF459501.1   | EU749062.1  | EU750201.1   |            |
| <i>Alnus acuminata</i>            |             | AJ251673.1    | FJ011815.1  |             | FJ012045.1  | FJ011930.1   |             |              |            |
| <i>Alnus glutinosa</i>            | FJ844574.1  | AJ251662.1    | HQ600562.1  |             | FJ012046.1  | FJ011931.1   |             | FN689654.1   | X54984.1   |
| <i>Alphitonia excelsa</i>         |             | HQ340157.1    |             |             | HQ325600.1  |              |             |              |            |
| <i>Anacardium excelsum</i>        | JQ590134.1  |               | JQ586468.1  |             |             |              |             |              |            |
| <i>Apodytes brachystylis</i> *    |             |               |             |             |             |              |             |              |            |
| <i>A. dimidiata</i>               | AJ428895.1  |               | AJ429311.1  |             | AJ430899.1  |              |             |              |            |
| <i>Berberis serratodentata</i> *  |             |               |             |             |             |              |             |              |            |
| <i>B. asiatica</i>                | GU934837.1  | GU934647.1    | GU934753.1  |             |             |              |             |              |            |
| <i>B. tinctoria</i>               | GU934903.1  | GU934729.1    | GU934805.1  |             |             |              |             |              |            |
| <i>Castanea sativa</i>            | HM849869.1  |               | JN895513.1  |             | AY586291.1  | AY526892.1   | FJ395668.1  | FN689628.1   |            |
| <i>Castanopsis fissa</i>          | JF941180.1  | AY040390.1    | FJ185053.1  |             | EF057140.1  |              |             |              |            |
| <i>Cecropia obtusifolia</i>       | JQ594312.1  |               | GQ981958.1  |             | DQ179377.1  |              |             | GQ429087.1   |            |
| <i>Cecropia schreberiana</i>      | HM446770.1  |               | HM446666.1  |             |             |              |             |              |            |
| <i>Chusquea quila</i> *           |             |               |             |             |             |              |             |              |            |
| <i>C. coronalis</i>               |             | GQ464814.1    | AF164389.1  |             | AY651842.1  | U54759.1     |             |              |            |
| <i>C. pinifolia</i>               |             |               |             |             |             | U54756.1     |             |              |            |
| <i>Clathrotropis brachypetala</i> |             | EF457714.1    |             |             | AF309827.1  |              |             |              |            |
| <i>Corylus avellana</i>           | AY263929.1  | HQ442261.1    | AY373442.1  | AY263944.1  | AY147072.1  | FJ011910.1   |             | FN689653.1   | AY263895.1 |
| <i>Corylus sieboldiana</i>        |             | AF297345.1    | AF297375.1  |             | FJ012034.1  | FJ011918.1   |             |              |            |
| <i>Cryptocarya leucophylla</i> *  |             |               |             |             |             |              |             |              |            |
| <i>C. alba</i>                    | GQ248578.1  |               | AJ247158.1  |             | JF950883.1  |              | GQ248754.1  | AM889877.1   |            |
| <i>C. meisneriana</i>             |             |               |             | AF197602.1  |             |              |             |              | AF293757.1 |
| <i>Dacryodes excelsa</i>          | GU246036.1  |               | AY594465.1  | GU246071.1  | AY594509.1  |              |             |              |            |
| <i>Dipterocarpus elongatus</i> *  |             |               |             |             |             |              |             |              |            |

**Table S3** continued

| Species                          | rbcl       | 18sITS5.8s25s | matk       | atpb       | trnl       | rpl16      | rpoB       | rpoC1      | 18S        |
|----------------------------------|------------|---------------|------------|------------|------------|------------|------------|------------|------------|
| <i>D. alatus</i>                 |            |               | AB246473.1 |            | AB246603.1 |            |            |            |            |
| <i>D. baudii</i>                 |            |               | AB006376.1 |            | AB006393.1 |            |            |            |            |
| <i>Dombeya goetzenii</i> *       |            |               |            |            |            |            |            |            |            |
| <i>D. calantha</i>               | GU981733.1 | AY083656.1    |            |            |            |            |            |            |            |
| <i>D. brevistyla</i>             |            | GU938045.1    |            |            |            | GU938000.1 |            |            |            |
| <i>Endiandra bessaphila</i> *    |            |               |            |            |            |            |            |            |            |
| <i>E. dichrophylla</i>           | JN564239.1 |               | JN564113.1 |            |            |            |            |            |            |
| <i>E. montana</i>                | JN564241.1 |               | JN564117.1 |            |            |            |            |            |            |
| <i>Eperua falcata</i>            | FJ038036.1 | AY955805.1    | EU361945.1 |            | AF365139.1 |            | FJ038269.1 | FJ038543.1 |            |
| <i>Eucalyptus globulus</i>       | 108802622  | AY615676.1    | AY521535.1 |            | HQ287710.1 |            | GQ248777.1 | GQ248939.1 |            |
| <i>Eucalyptus microcorys</i>     |            | EF694714.1    | HQ287634.1 |            | HQ287718.1 |            |            |            |            |
| <i>Eucalyptus obliqua</i>        |            | AF058484.1    |            |            |            |            |            |            |            |
| <i>Fagus sylvatica</i>           | L13340.2   | AY232985.1    | JN895059.1 |            | AF133654.1 |            | FJ395671.1 | FN689626.1 |            |
| <i>Ficus coronata</i>            |            | AY730131.1    |            |            |            |            |            |            |            |
| <i>Ficus fistulosa</i>           | HQ415155.1 | AY730137.1    | HQ415328.1 |            |            |            |            |            |            |
| <i>Ficus insipida</i>            | GQ981738.1 | AF165390.1    | JQ588407.1 |            | AB445569.1 |            |            |            |            |
| <i>Ficus maxima</i>              | GQ981739.1 | AF165392.1    | GQ981995.1 |            |            |            |            |            |            |
| <i>Fraxinus excelsior</i>        | FJ862056.1 | EU314848.1    | AM933427.1 |            | AF231830.1 | AY911660.1 | GU991688.1 | FN689636.1 |            |
| <i>Fuchsia magellanica</i>       | HM850013.1 | AY357794.1    | HM851004.1 |            | AY357835.1 | AY357876.1 |            |            |            |
| <i>Gigantochloa scortechinii</i> |            |               | EU434258.1 |            | EU434066.1 |            |            |            |            |
| <i>Hampea appendiculata</i>      | JQ592504.1 |               | AY589062.1 |            |            |            |            |            |            |
| <i>Hirtella triandra</i>         | GQ424481.1 | GQ424461.1    | JQ587241.1 |            |            |            |            |            |            |
| <i>Hura crepitans</i>            | AB233886.1 |               | AB233782.1 | AB233678.1 | AY794636.1 | JN249424.1 |            |            | AB233574.1 |
| <i>Inga punctata</i>             | JQ591810.1 | GU013231.1    | AY386922.1 |            | GQ118737.1 |            |            | GQ118815.1 |            |
| <i>Liquidambar formosana</i>     | DQ352384.1 | AF133230.1    | AF015650.1 |            | DQ352220.1 |            |            |            |            |
| <i>Macaranga tanarius</i>        | AB233866.1 | DQ866584.1    | AB233762.1 | AB233658.1 | DQ899243.1 |            |            |            | AB233554.1 |
| <i>Manilkara bidentata</i>       | FJ038167.1 | FJ037872.1    | HM446708.2 |            | FJ039185.1 |            |            |            |            |

**Table S3** continued

| Species                         | rbcl       | 18sITS5.8s25s | matk       | atpb       | trnl       | rpl16      | rpoB       | rpoC1      | 18S        |
|---------------------------------|------------|---------------|------------|------------|------------|------------|------------|------------|------------|
| <i>Meliccytus ramiflorus</i>    |            | EF635449.1    | DQ842612.1 |            | DQ085928.1 |            |            |            |            |
| <i>Meliosma dentata*</i>        |            |               |            |            |            |            |            |            |            |
| <i>M. veitchiorum</i>           | AF206793.1 |               | FJ626530.1 | AF209626.1 | FJ626570.1 |            |            |            | AF206961.1 |
| <i>M. rigida</i>                | HQ415132.1 |               | HQ415309.1 |            |            |            |            |            |            |
| <i>Miconia chartacea</i>        |            | EU055749.1    |            |            |            |            |            |            |            |
| <i>Miconia multispicata</i>     |            | EU055808.1    |            |            |            |            |            |            |            |
| <i>Myoporum laetum</i>          |            | EU886847.1    |            |            |            |            |            |            |            |
| <i>Myrcia guianensis</i>        |            | JN091224.1    |            |            | JN091351.1 |            |            |            |            |
| <i>Myriocarpa longipes</i>      | AY208705.1 |               | JQ589393.1 |            | AY208724.1 |            |            |            |            |
| <i>Nothofagus dombeyi</i>       | L13350.2   | GQ863252.1    |            |            |            |            |            |            |            |
| <i>Nothofagus pumilio</i>       | L13360.2   | GQ863256.1    |            |            |            |            |            |            |            |
| <i>Peumus boldus</i>            | AF206807.1 | GU177689.1    | 60495431   | AF209650.1 |            |            |            |            | AF206988.1 |
| <i>Pittosporum eugenioides</i>  |            | AY829031.1    |            |            | AY829067.1 |            |            |            |            |
| <i>Pittosporum viridiflorum</i> | JF265552.1 |               | JF270894.1 |            |            |            |            |            |            |
| <i>Pomaderris apetala*</i>      |            |               |            |            |            |            |            |            |            |
| <i>P. rugosa</i>                | AJ390063.1 | DQ146615.1    |            |            | AJ390363.1 |            |            |            |            |
| <i>P. brevifolia</i>            | AY911564.1 |               |            |            | EF528513.1 |            |            |            |            |
| <i>Pongamia pinnata</i>         | AY289676.1 | AF467493.1    |            |            |            |            |            |            | AY289629.1 |
| <i>Protium brasiliense*</i>     |            |               |            |            |            |            |            |            |            |
| <i>P. guianense</i>             | GU246041.1 |               |            | GU246076.1 | GU246107.1 |            |            |            |            |
| <i>P. trifoliolatum</i>         | FJ037985.1 |               | FJ514630.1 |            | FJ039265.1 |            | FJ038234.1 | FJ038448.1 |            |
| <i>Prunus jamasakura*</i>       |            |               |            |            |            |            |            |            |            |
| <i>P. cerasus</i>               | JN893012.1 | FJ899099.1    | FN668844.1 |            | EF010970.1 |            | FN668892.1 |            |            |
| <i>P. serrulata</i>             | GU363817.1 |               | GU363780.1 |            |            | AB254479.1 |            |            |            |
| <i>Qualea rosea</i>             | FJ038210.1 |               |            |            | FJ039348.1 |            | FJ038396.1 | FJ038836.1 |            |
| <i>Quercus robur</i>            | AB125025.1 |               | AJ491718.1 |            | HM770039.1 |            | FJ395716.1 | FN689618.1 |            |
| <i>Quercus rubra</i>            | AB125026.1 | AF098418.1    | AB125043.1 | AF209663.1 | AB124992.1 |            | EU749135.1 | EU750276.1 | AF132892.1 |

**Table S3** continued

| Species                         | rbcl       | 18sITS5.8s25s | matk       | atpb       | trnl       | rpl16      | rpoB       | rpoC1      | 18S        |
|---------------------------------|------------|---------------|------------|------------|------------|------------|------------|------------|------------|
| <i>Quercus serrata</i>          | AB060576.1 | HE585145.1    | AB060067.1 |            | AB063538.1 |            |            |            |            |
| <i>Rhus natalensis</i> *        |            |               |            |            |            |            |            |            |            |
| <i>R. copallina</i>             | U00440.1   | AY641483.1    | AY594485.1 | AF035912.1 | AY640438.1 |            |            |            |            |
| <i>R. typhina</i>               | HQ590236.1 | FJ945920.1    | HQ593409.1 |            | AY640446.1 |            |            |            | GU476470.1 |
| <i>Rinorea sylvatica</i>        | GQ981866.1 |               | GQ982086.1 |            | JN714115.1 |            |            |            |            |
| <i>Syzygium cumini</i>          | GQ870669.3 | FM887016.1    |            |            | JF804935.1 |            |            | GQ870669.3 |            |
| <i>Tabernaemontana undulata</i> |            |               | GU973970.1 |            | HQ634605.1 | GU974244.1 |            |            |            |
| <i>Tilia americana</i>          | AF022127.1 |               | HQ593469.1 |            |            |            |            | HQ594158.1 | AF207042.1 |
| <i>Triplaris dugandii</i> *     |            |               |            |            |            |            |            |            |            |
| <i>T. americana</i>             | Y16910.1   | FJ154486.1    | AY042668.1 |            |            |            |            |            |            |
| <i>T. poeppigiana</i>           | AF297137.1 | FJ154487.1    | FJ154497.1 |            |            |            |            |            |            |
| <i>Vitex leucoxylon</i> *       |            |               |            |            |            |            |            |            |            |
| <i>V. negundo</i>               | JQ322525.1 | FM200123.1    | AB284176.1 |            | DQ304786.1 |            |            |            |            |
| <i>V. trifolia</i>              | GQ436526.1 | FM200128.1    | AB284175.1 |            |            |            |            |            |            |
| <i>Vochysia densiflora</i> *    |            |               |            |            |            |            |            |            |            |
| <i>V. guatemalensis</i>         | JQ594494.1 |               | JQ589526.1 |            |            |            |            |            |            |
| <i>V. ferruginea</i>            | GQ981918.1 |               | GQ982128.1 |            |            |            |            |            |            |
| <i>Zinowiewia coccina</i>       |            | EU328767.1    | AY935922.1 | AY935848.1 | EU328803.1 |            |            |            | AY929364.1 |
| <i>Zygia cataractae</i> *       |            |               |            |            |            |            |            |            |            |
| <i>Z. racemosa</i>              | FJ038059.1 | FJ037829.1    | FJ037923.1 |            | FJ039293.1 |            | FJ038294.1 | FJ038590.1 |            |
| <i>Z. longifolia</i>            | JQ592097.1 |               | JQ587915.1 |            |            |            |            |            |            |
| <b>OUTGROUPS</b>                |            |               |            |            |            |            |            |            |            |
| <i>Cabomba caroliniana</i>      | M77027     |               | DQ185527.1 | AF187058   |            |            |            |            | AF206878   |
| <i>Barclaya longifolia</i>      | M77028     |               | AF092982.1 | AF209536   |            |            |            |            | AF096692   |
| <i>Austrobaileya scandens</i>   | L12632     |               | DQ182344.1 | AJ235403   | EF210565.1 |            |            |            | U42503     |
| <i>Schisandra sphenanthera</i>  | L12665     |               |            | AJ235599   |            | AY326492.1 |            |            |            |
| <i>Amborella trichopoda</i>     | L12628     |               | DQ185522.1 | D89556     |            |            |            |            | U42497     |

**Table S4.** Variance inflation factors (VIFs) for the variables included in general linear models.

| <b>Variable</b>                    | <b>VIF</b> |
|------------------------------------|------------|
| Mean annual temperature (T)        | 1.16       |
| Specific leaf area (SLA)           | 1.06       |
| Litter phylogenetic diversity (PD) | 1.13       |
| Stream pH                          | 1.18       |
| Wetted stream width (SW)           | 1.32       |





**Fig. S2A.** Climographs of tropical study sites showing annual variation in monthly mean temperature (line) and precipitation (shade; note change of scale on darker shade). Site codes are given in Table S1. Legend provided in top left-hand panel.

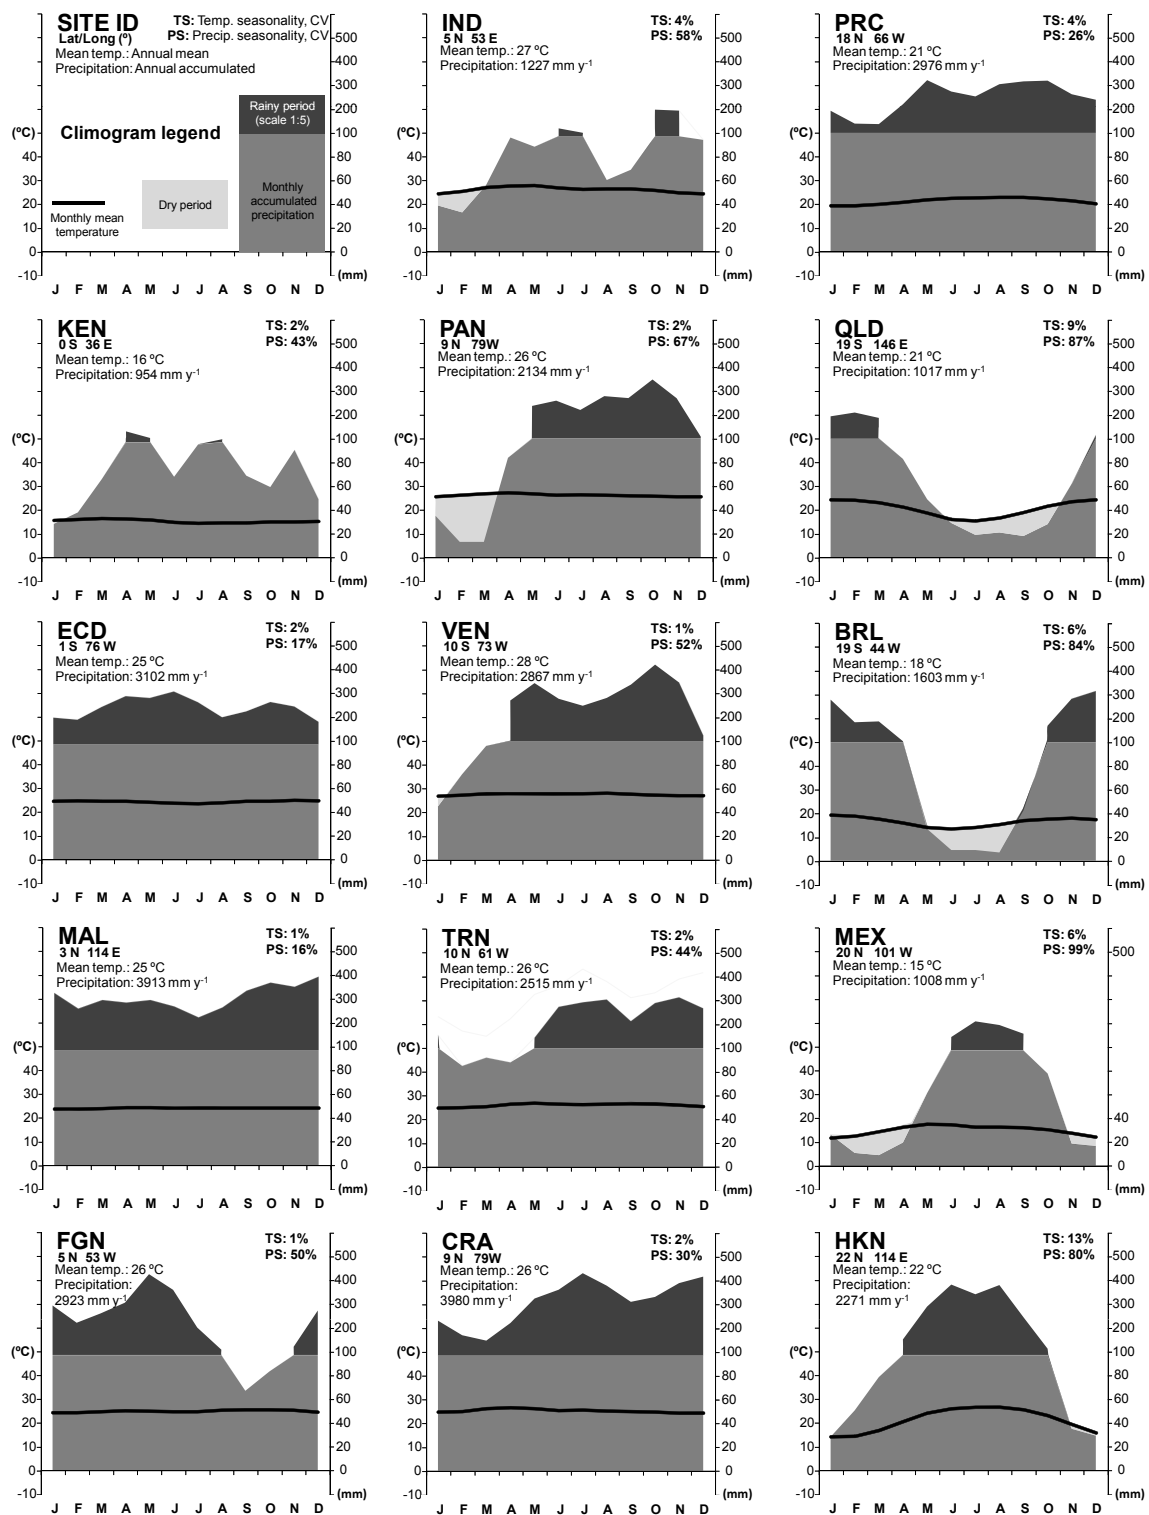

**Fig. S2B.** Climographs of temperate study sites (see Fig. S2a legend).

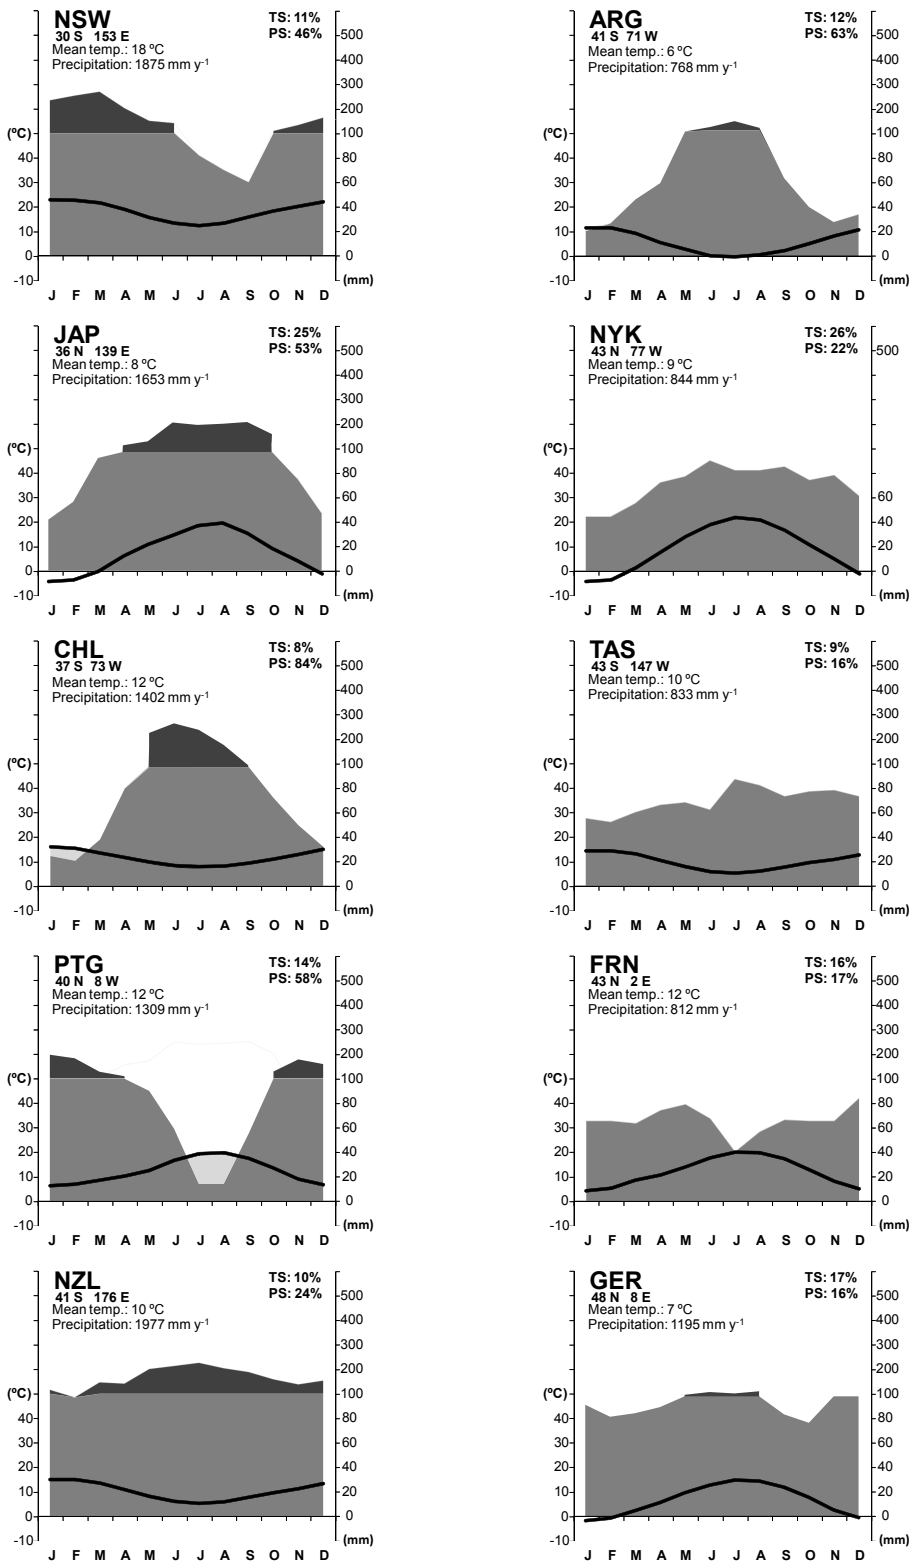

**Fig. S3.** Molecular phylogeny of 90 plant species and 8935 bps of DNA (including 5 outgroups) using partial 18S ribosomal rDNA, rbcL, matK, atpB, trnL, rpl16, rpoB, and rpoC1 sequences available in GenBank.

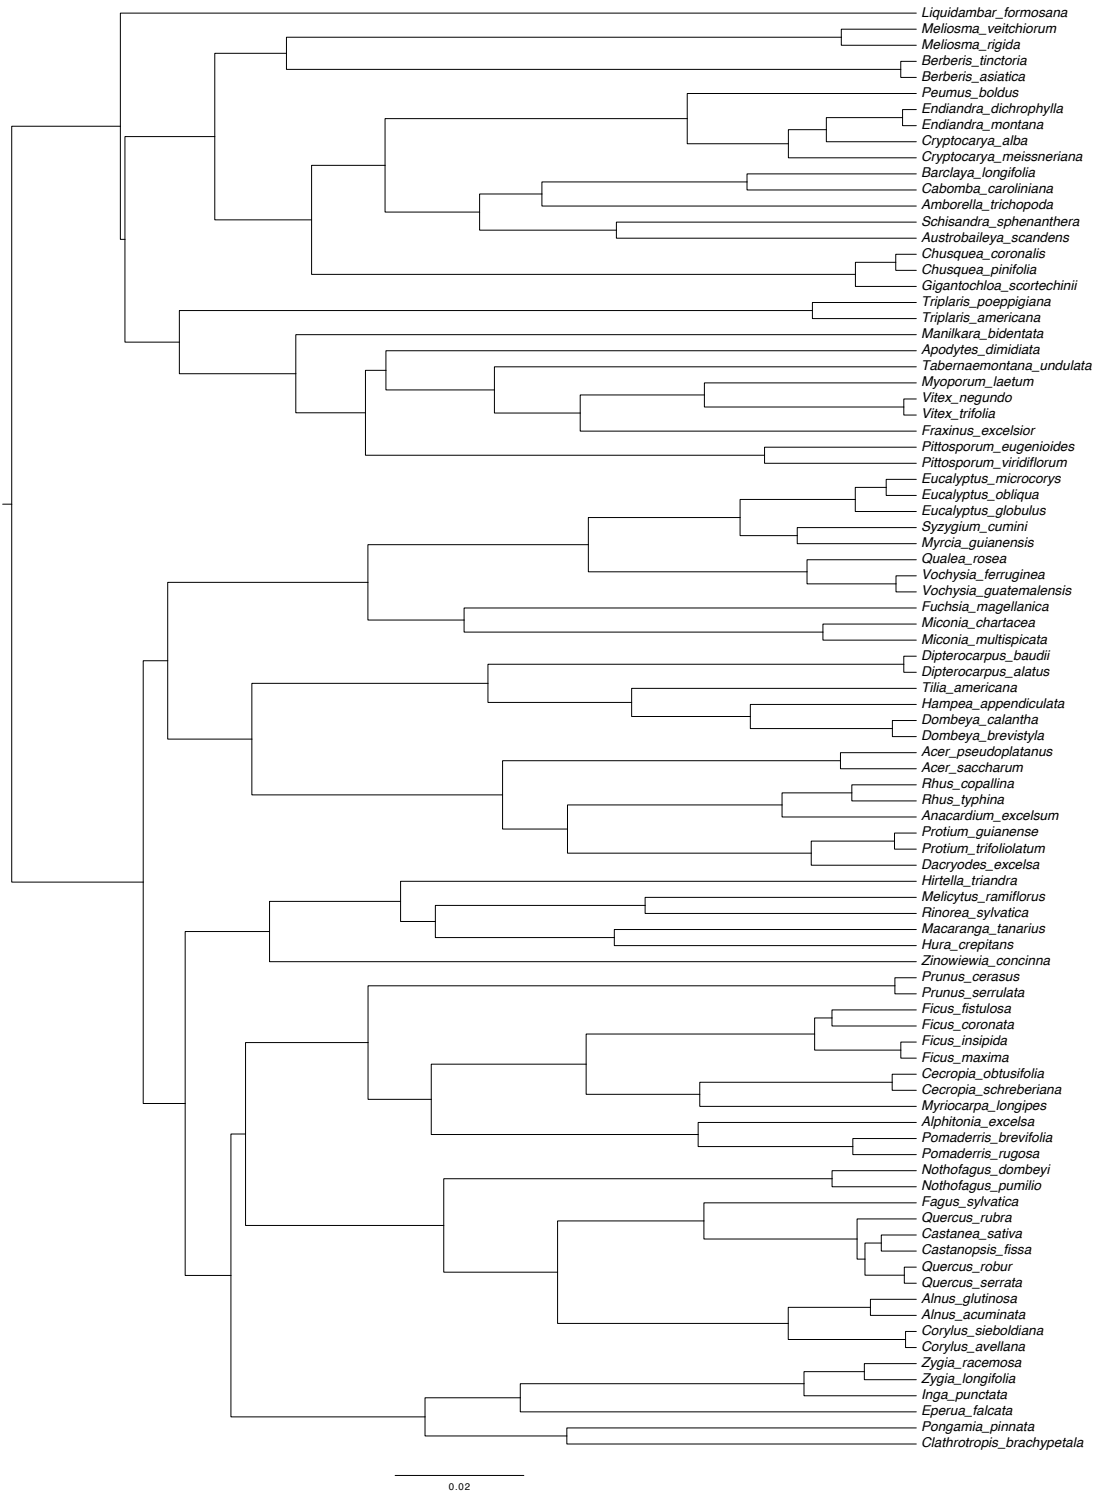

Supplement: rspb20152664supp1.pdf [file rspb20152664supp1.pdf]
